# Supplementary material
Source: bioRxiv or medRxiv preprint supplement (https://www.biorxiv.org/content/biorxiv/early/2021/07/31/2021.07.30.454424/DC4/embed/media-4.pdf)

Phenogram SVL

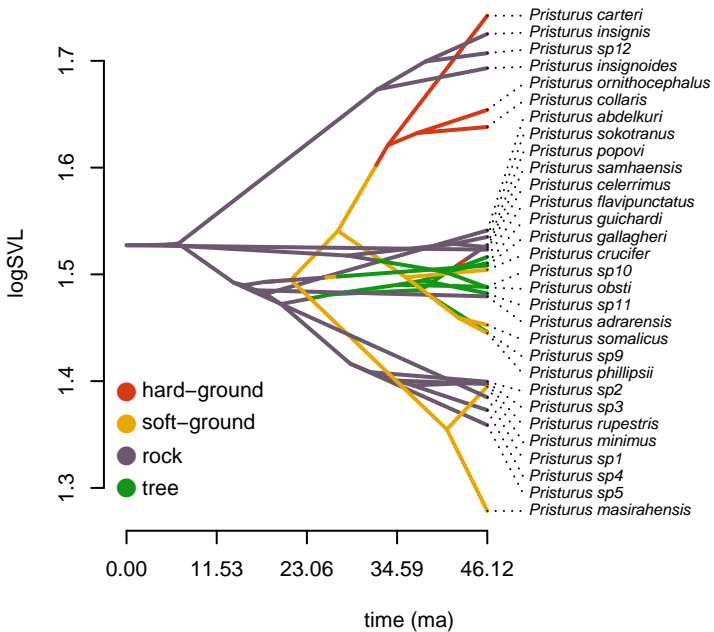

Phenogram PC1

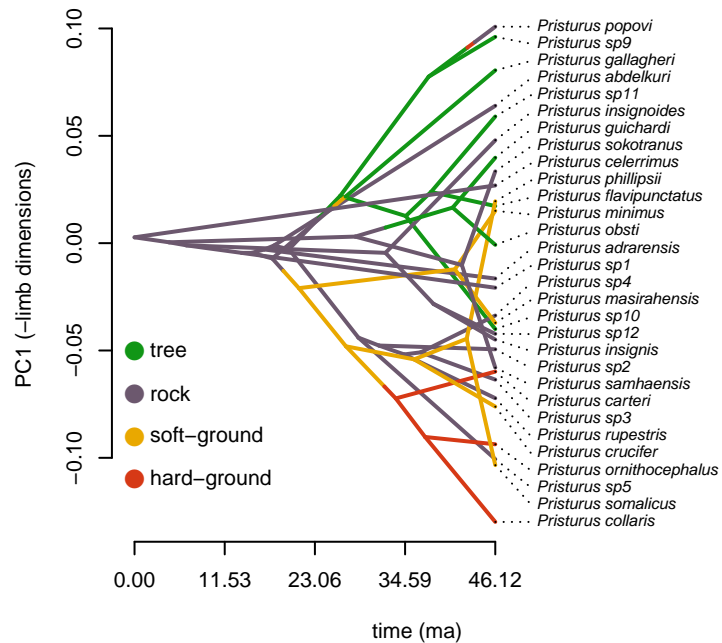

Phenogram PC2

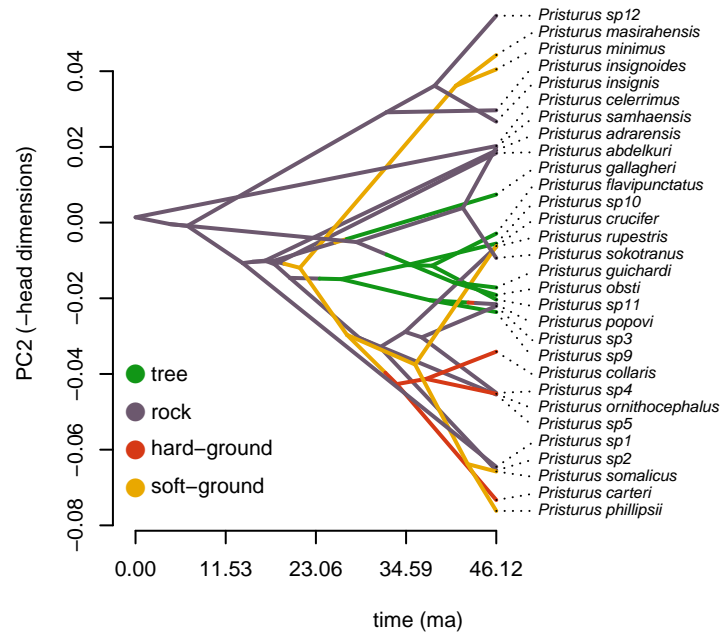

Supplement: Supplementary file [file media-4.pdf]
